# Supplementary material for: A novel role for endothelial tetrahydrobiopterin in mitochondrial redox balance
Source: PubMed Central journal article supplement (PMC5338462; doi:10.1016/j.freeradbiomed.2017.01.012), 2017-03
Supplement: mmc1.pdf [file mmc1.pdf]

SUPPLEMENTAL FIGURE 1

| <b>Target protein</b>                            | <b>Supplier</b>              | <b>Dilution</b> |
|--------------------------------------------------|------------------------------|-----------------|
| GTP cyclohydrolase (GTPCH)                       | Prof Steve Gross, Cornell    | 1:50,000        |
| Glyceraldehyde 3-phosphate dehydrogenase (GAPDH) | Millipore                    | 1:10,000        |
| Succinate dehydrogenase (SDH)                    | Cell Signaling Technology    | 1:1000          |
| Voltage-dependent anion channel (VDAC)           | Cell Signaling Technology    | 1:1000          |
| Cytochrome c                                     | Cell Signaling Technology    | 1:1000          |
| Cytochrome c oxidase subunit 4 (COX IV)          | Cell Signaling Technology    | 1:1000          |
| Pyruvate dehydrogenase (PDH)                     | Cell Signaling Technology    | 1:1000          |
| TOM20                                            | BD Transduction Laboratories | 1:2000          |
| P62                                              | Sigma Aldrich                | 1:500           |
| Thioredoxin (TRX)                                | BD Transduction Laboratories | 1:5000          |
| Thioredoxin interacting protein (TXNIP)          | Sigma Aldrich                | 1:1000          |
| Glutathione reductase (GR)                       | Santa Cruz                   | 1:5000          |
| Fumarate hydratase (FH)                          | Santa Cruz                   | 1:2500          |
| Mitofusin 2                                      | Cell Signaling Technology    | 1:1000          |
| OPA 1                                            | Cell Signaling Technology    | 1:1000          |
